# Supplementary material
Source: PubMed Central journal article supplement (PMC3864811)
Supplement: NIHMS521599-supplement-01.pdf [file NIHMS521599-supplement-01.pdf]

- 1 **Fig. S1:** *Weighted UniFrac clustering of HIV dataset.*  
 2 Each point represents a single fecal sample. Panels A and B represent the same PCoA  
 3 analysis but for clarity, Panel A only shows the HIV positive individuals who were not on  
 4 ART at the time of initial sample collection and HIV-negative controls, and Panel B  
 5 shows only the HIV positive individuals on ART. Points are labeled with ART duration  
 6 at the time of sample collection in months. Samples from the same individual at two  
 7 different timepoints are joined with a line. Bacterial families are plotted as a weighted  
 8 average of the coordinates of all samples, where the weights are the relative abundances  
 9 of the taxon in the samples (grey circles) using the Biplot functionality of QIIME. The  
 10 size of the sphere representing a taxon is proportional to the mean relative abundance of  
 11 the taxon across all samples. Related to Fig. 1.  
 12

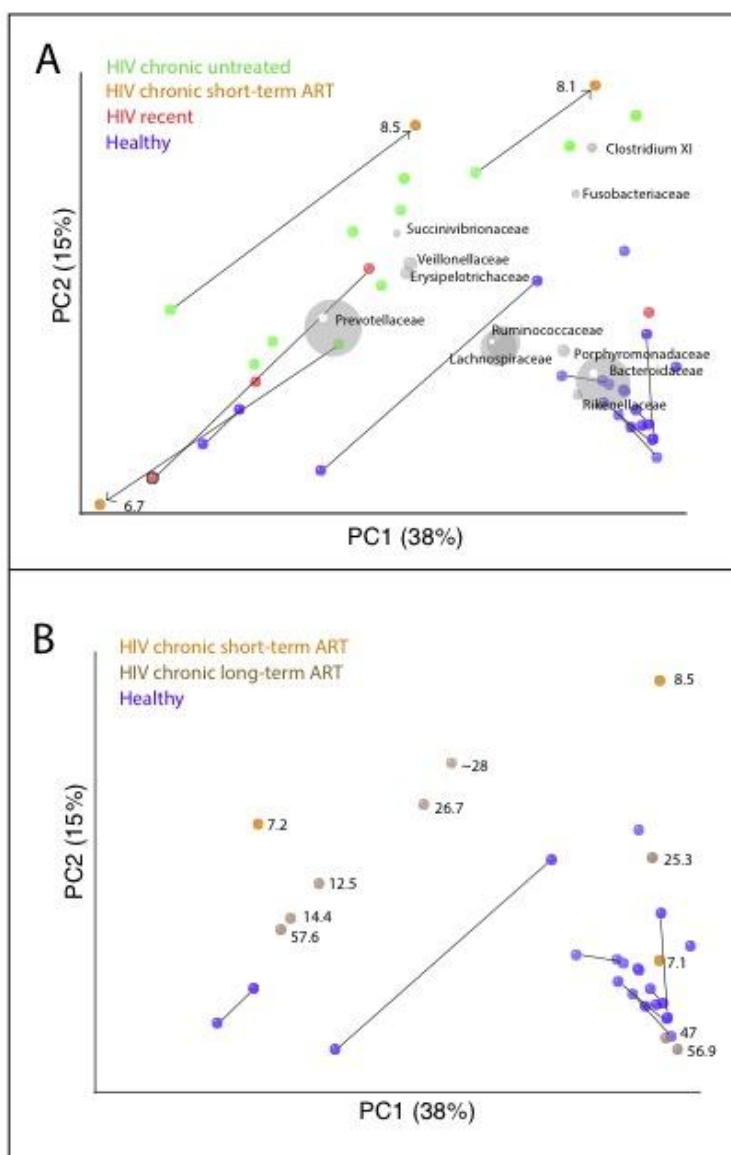

14

15 **Fig. S2:** *Phylogenetic tree showing how OTUs that discriminate by HIV-status and by*  
16 *culture relate to each other and to bacterial species.*

17 Trees show the relationship between OTUs that 1) Discriminated between individuals  
18 chronically infected with HIV (HIVpos; red) and healthy controls (HIVneg; blue) or 2)

19 Discriminated between adults from Malawi and the Amazonas State of Venezuela

20 (Agrarian; orange) and from the US (Western; green). Related bacterial species are in

21 black text. Trees were made by inserting the representative sequence of the OTUs and of

22 related bacterial species into a reference tree using the parsimony insertion algorithm in

23 ARB (see methods). Panels show A) Bacteroidetes, B) Clostridiales, C)

24 Erysipelotrichales, D) Proteobacteria, and E) Veillonellaceae.

25 This figure allows for evaluation of whether discriminating OTUs are parts of

26 deeper phylogenetic lineages, their relationship to types species, and the lineages that are

27 driving factors of the observed relationship between the microbiota in HIV positive

28 individuals and healthy individuals in agrarian cultures. In some cases the same

29 greengenes reference OTU was important both for differentiating adults from agrarian

30 cultures from the US and HIV-positive individuals within the US population from HIV-

31 negative. These include OTU168718 (related to *Clostridium viride*; Ruminococcaceae),

32 OTU76547 (related to *Mogibacterium neglectum*; Clostridium XIII), OTU562244

33 (related to *Sutterella wadsworthia*; Beta Proteobacteria), OTU268604 (related to

34 *Paraprevotella*) and 3 OTUs closely related to *P. stercorae*. Different Agrarian- and

35 HIV-positive associated greengenes OTUs were also sometimes highly related, such as in

36 a lineage related to the acetogen *Sporobacter termitidis* (Ruminococcaceae) and one

37 containing *E. bifforme* (Erysipelotrichales). Related to Fig. 2.

38

39

40

41 **Fig. S2**

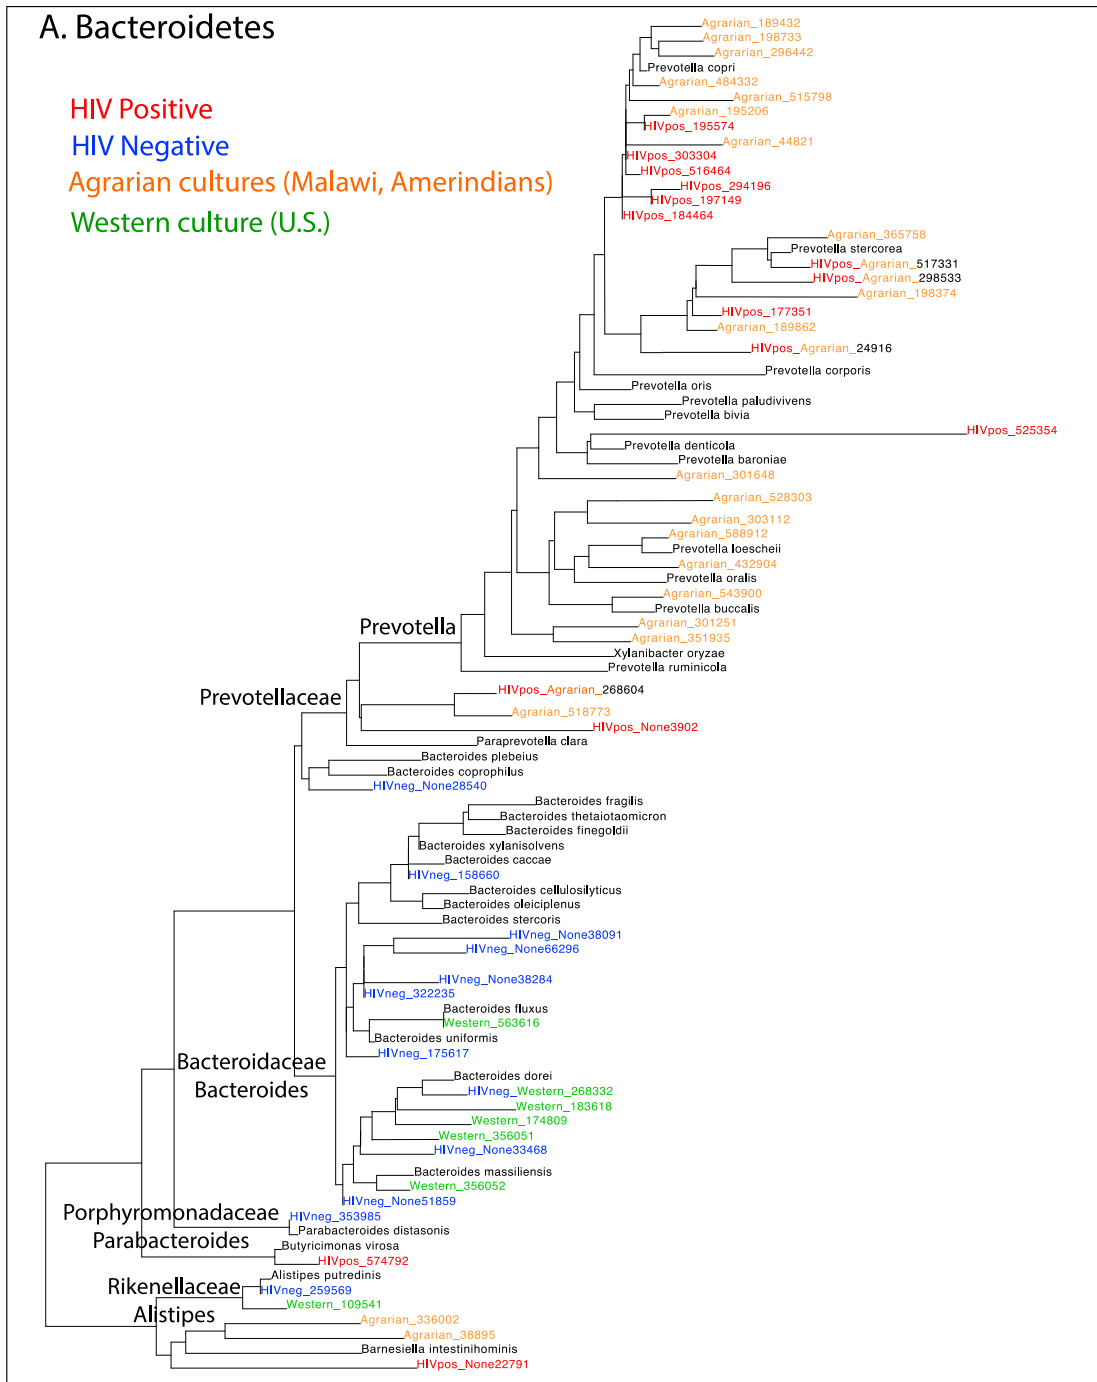

42

43

44 **Fig. S2 (cont.)**

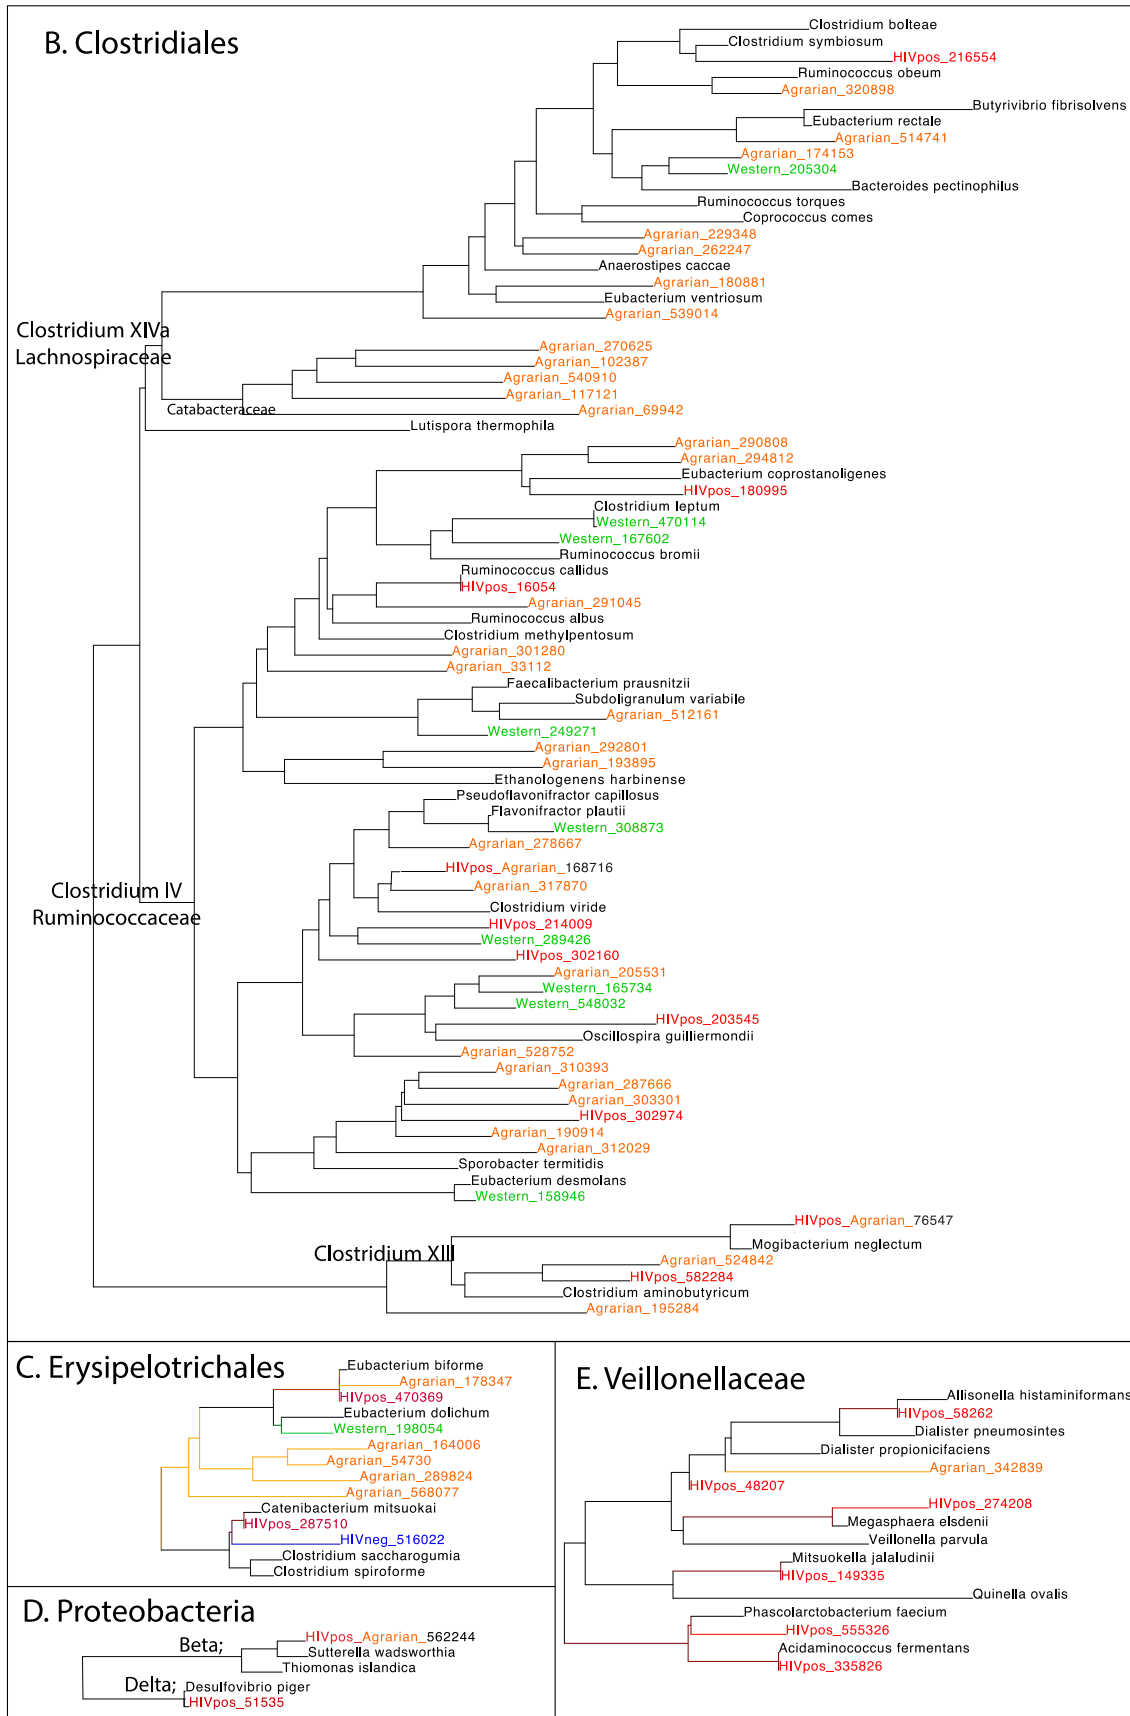

46

47 **Fig. S3:** *Metaanalysis of HIV samples with a global survey of gut microbiota diversity*  
48 *and a study of Inflammatory Bowel Disease.*

49 Since HIV has been described to produce a chronic inflammatory state in the gut  
50 (Bjarnason et al., 1996; Brenchley and Douek, 2008), we also used metaanalysis to  
51 determine whether there was a relationship between the microbiota in HIV-infection and  
52 a chronic inflammatory disease of the gut. We combined this study's data with fecal  
53 samples from individuals ages 10-66 from 1) A survey of individuals from the US,  
54 Malawi and the Amazonas State of Venezuela (Global gut)(Yatsunenکو et al., 2012) and  
55 2) a study that detected differences between fecal microbiota of individuals with ileal  
56 Crohn's disease and healthy controls (IBD study)(Willing et al., 2010). Note that the  
57 latter study also included individuals with colonic Crohn's disease and ulcerative colitis,  
58 but we only show microbiota from ileal Crohn's disease here because it had the strongest  
59 divergence from healthy controls (Willing et al., 2010).

60 PCoA clustering with unweighted UniFrac was largely driven by technical  
61 variation between studies (Panel A), as might be expected since they varied  
62 methodologically (Table S3). Since all 3 studies sequenced fecal samples from healthy  
63 US adults however, we can partially correct for this study effect by rotating the axes so  
64 that the healthy samples from each of the three studies overlap (Panel B). Samples from  
65 individuals with ileal Crohn's disease now separate from healthy controls on one axis  
66 (left to right Panel C), and individuals from the US separate from those from agrarian  
67 cultures on a distinct axis of variation (top to bottom in Panel C). If we now show the  
68 position of fecal samples from individuals from the HIV study in this same plot (Panel  
69 D), individuals with chronic HIV infection (treated and untreated colored the same) and  
70 with recent HIV infection, all generally position further left (closer to IBD samples along

71 this axis) than healthy controls from the same study. As already shown (Fig. 3), the  
72 majority of individuals with chronic HIV infection cluster closer to agrarian cultures.  
73 Related to Fig. 3.

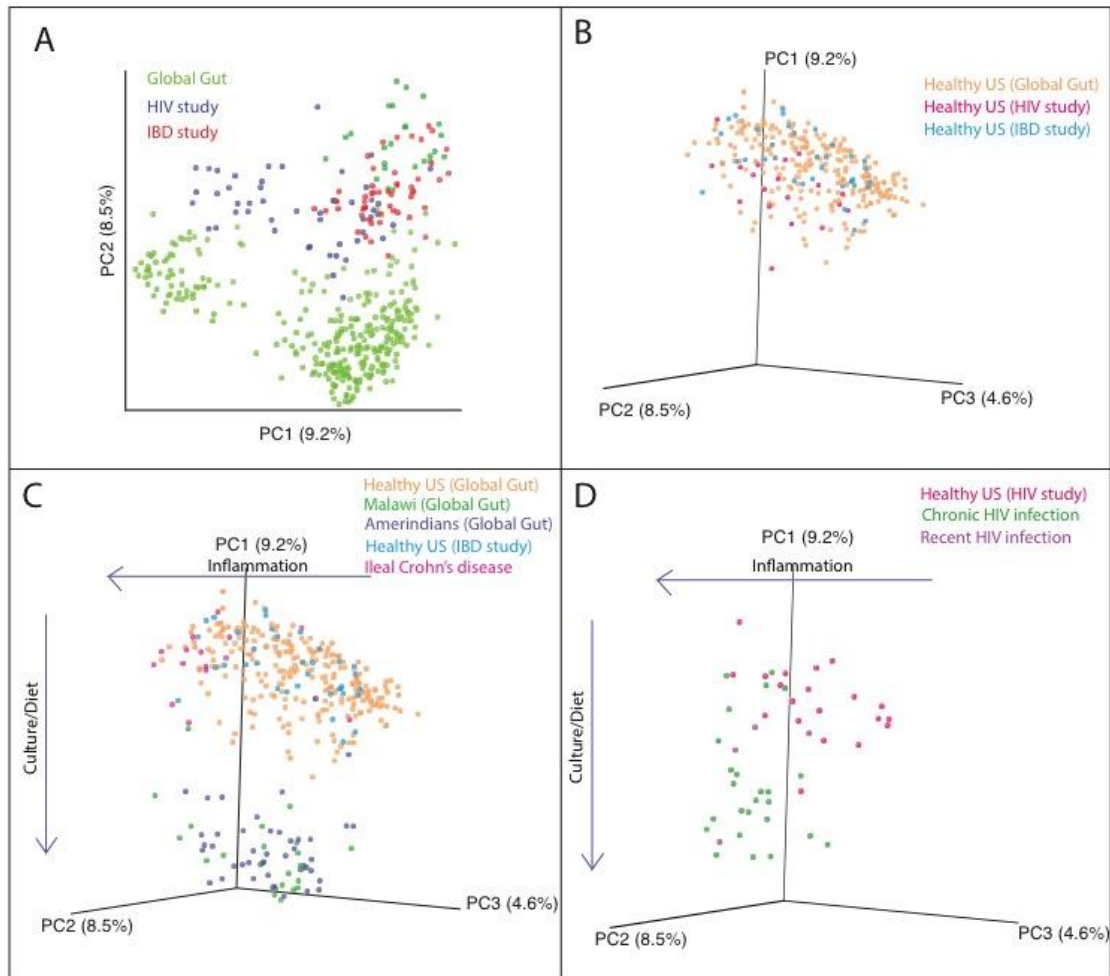

74  
75  
76

77

78 **Fig. S4.** *TNF- $\alpha$  and IL-10 production in response to lysates from selected bacteria is*

79 *higher in HIV positive than HIV negative subjects.*

80 PBMC were stimulated with bacterial lysates and LPS. A) *TNF- $\alpha$*  and B) *IL-10* as

81 measured using a bead array assay after a 24 hour stimulation. An asterisk indicates that

82 the responses was significantly higher in HIV-positive individuals compared to controls

83 with Mann-Whitney t-tests ( $p < 0.05$ ). Related to Fig. 4.

84

85

86

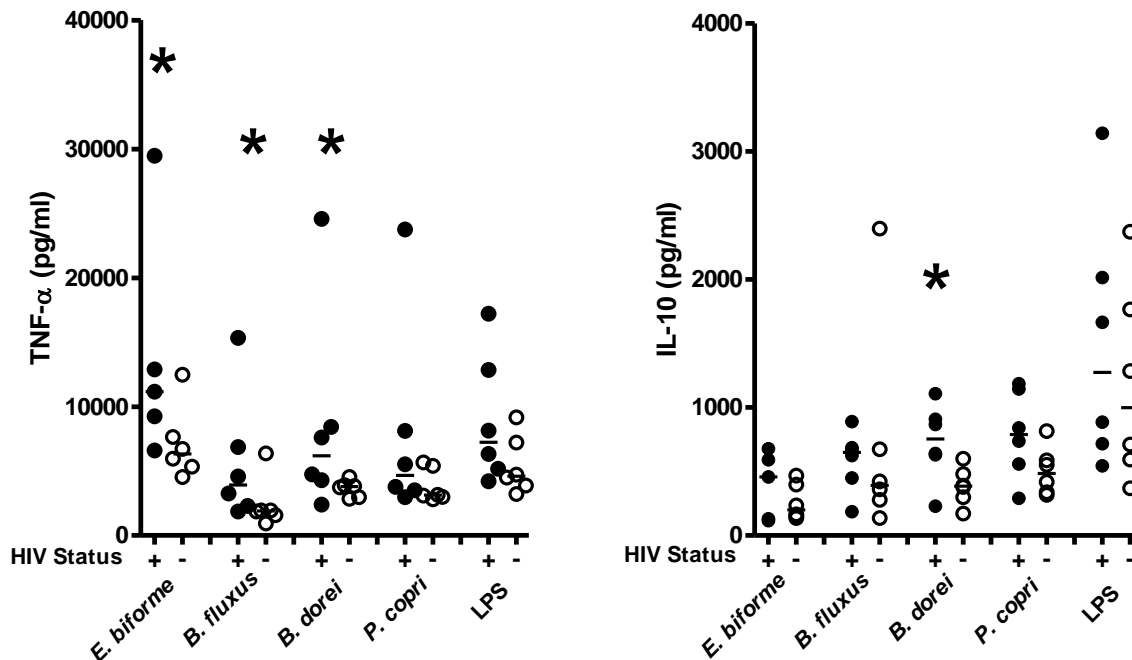

87

88



**Table S1:** Detailed characteristics of subject cohorts summarized in Table 1

| Subject ID | HIV Status | Cohort | Age Years | Sex | Hispanic | Race             | ART Treated | Time on ART (months) | Visits (months apart) | CD4       | Viral Load | Antibiotics past 6 months | BMI       |
|------------|------------|--------|-----------|-----|----------|------------------|-------------|----------------------|-----------------------|-----------|------------|---------------------------|-----------|
| LHM002     | Recent     | 1      | 26        | F   | No       | White            | No/No       | 0/0                  | 2(13.2)               | 1342/1071 | 418/11,100 | Yes/No                    | 32.4/38.8 |
| LHM026     | Recent     | 1      | 34        | M   | No       | White            | No          | 0                    | 1                     | 452       | 449,000    | Yes                       | 38.8      |
| LHM032     | Recent     | 1      | 33        | M   | No       | White            | No          | 0                    | 1                     | 555       | 199,000    | Yes                       | 23.1      |
| LHM011     | Chronic    | 2      | 27        | M   | No       | White            | No          | 0                    | 1                     | 493       | 55,495     | Yes                       | 37        |
| LHM025     | Chronic    | 2      | 25        | M   | No       | African American | No          | 0                    | 1                     | 291       | 72,300     | Yes                       | 21.6      |
| LHM028     | Chronic    | 2      | 35        | M   | Yes      | African American | No/Yes      | 0/8.5                | 2(8.5)                | 447/600   | 301,000/39 | Yes/no                    | 26.2/24.4 |
| LHM030     | Chronic    | 2      | 30        | M   | Yes      | White            | No          | 0                    | 1                     | 1095      | 50,200     | No                        | 19.2      |
| LHM031     | Chronic    | 2      | 25        | M   | No       | White            | No/Yes      | 0/8.1                | 2(8.1)                | 614/681   | 8,925/40   | Yes/No                    | 25.9/24.0 |
| LHM034     | Chronic    | 2      | 33        | M   | No       | White            | No/Yes      | 0/6.7                | 2(6.7)                | 537/594   | 17,815/40  | No                        | 27.2/25.0 |
| LHM035     | Chronic    | 2      | 34        | M   | Yes      | American Indian  | No          | 0                    | 1                     | 509       | 1350       | No                        | 26.4      |
| LHM047     | Chronic    | 2      | 42        | M   | No       | White            | No          | 0                    | 1                     | 594       | 7010       | No                        | 28.5      |
| LHM052     | Chronic    | 2      | 28        | M   | No       | White            | No          | 0                    | 1                     | 658       | 72,500     | No                        | 21.3      |
| LHM062     | Chronic    | 2      | 27        | M   | No       | White            | No          | 0                    | 1                     | 270       | 869,000    | No                        | 23.7      |
| LHM069     | Chronic    | 2      | 23        | M   | Yes      | White            | No          | 0                    | 1                     | 551       | 74,600     | No                        | 21.3      |
| LHM004     | Chronic    | 2*     | 31        | M   | Yes      | White            | Yes         | 7.2                  | 1                     | 547       | 40         | No                        | 30        |
| LHM005     | Chronic    | 2*     | 54        | F   | No       | African American | Yes         | 8.5                  | 1                     | 658       | 297        | No                        | 33.1      |
| LHM017     | Chronic    | 2*     | 28        | M   | No       | White            | Yes         | 7.1                  | 1                     | 576       | 40         | No                        | 25.9      |
| LHM021     | Chronic    | 3      | 51        | M   | No       | White            | Yes         | 12.5                 | 1                     | 311       | 44         | No                        | 26.8      |

Supplemental Materials for Lozupone et al. Gut microbiota alterations with HIV-1 infection

|        |         |   |    |   |         |                  |     |      |         |     |     |        |           |
|--------|---------|---|----|---|---------|------------------|-----|------|---------|-----|-----|--------|-----------|
| LHM036 | Chronic | 3 | 48 | M | No      | White            | Yes | 57.6 | 1       | 443 | 31  | No     | 26.3      |
| LHM037 | Chronic | 3 | 34 | M | Yes     | White            | Yes | 47   | 1       | 364 | 21  | No     | 21.7      |
| LHM042 | Chronic | 3 | 54 | M | No      | White            | Yes | 26.7 | 1       | 876 | 20  | No     | 25.8      |
| LHM045 | Chronic | 3 | 43 | M | No      | African American | Yes | 14.4 | 1       | 204 | 20  | Yes    | 20.4      |
| LHM048 | Chronic | 3 | 53 | F | No      | White            | Yes | 25.3 | 1       | 818 | 819 | No     | 38.4      |
| LHM063 | Chronic | 3 | 32 | M | Yes     | White            | Yes | ~28  | 1       | 611 | <20 | No     | 19.2      |
| LHM065 | Chronic | 3 | 44 | M | No      | White            | Yes | 56.9 | 1       | 239 | <20 | No     | 18.6      |
| LHM001 | Neg     | 4 | 24 | M | No      | White            | NA  | NA   | 2(11.7) | NA  | NA  | No/No  | 25.4/25.4 |
| LHM003 | Neg     | 4 | 26 | F | No      | White            | NA  | NA   | 2(13.6) | NA  | NA  | No     | 24.9/24.9 |
| LHM008 | Neg     | 4 | 51 | M | Refused | White            | NA  | NA   | 1       | NA  | NA  | No     | 24.9      |
| LHM009 | Neg     | 4 | 37 | M | No      | White            | NA  | NA   | 2(13.6) | NA  | NA  | No/No  | 30.1/30.2 |
| LHM010 | Neg     | 4 | 22 | F | No      | White            | NA  | NA   | 1       | NA  | NA  | Yes    | 22.3      |
| LHM012 | Neg     | 4 | 53 | M | No      | White            | NA  | NA   | 1       | NA  | NA  | No     | 25        |
| LHM013 | Neg     | 4 | 49 | M | No      | African American | NA  | NA   | 2(13.6) | NA  | NA  | No/No  | 30.5/29.2 |
| LHM014 | Neg     | 4 | 46 | F | No      | White            | NA  | NA   | 2(15)   | NA  | NA  | No/Yes | 30.4/30.6 |
| LHM015 | Neg     | 4 | 44 | M | No      | White            | NA  | NA   | 2(15.2) | NA  | NA  | No/No  | 29.4/24.9 |
| LHM016 | Neg     | 4 | 21 | M | No      | White            | NA  | NA   | 1       | NA  | NA  | Yes    | 21.2      |
| LHM019 | Neg     | 4 | 30 | F | No      | White            | NA  | NA   | 2(13.6) | NA  | NA  | No/No  | 27.4/25.8 |
| LHM027 | Neg     | 4 | 52 | F | Yes     | White            | NA  | NA   | 2(12.8) | NA  | NA  | No/No  | 19.3/24.4 |
| LHM049 | Neg     | 4 | 31 | M | No      | White            | NA  | NA   | 1       | NA  | NA  | No     | 25.2      |

**Table S2:** *Microbial taxa that differ between untreated individuals with chronic HIV infection and HIV-seronegative individuals*

Panels A) and B) show genera and families that significantly differ with HIV-infection. Those with higher relative abundance with HIV-infection are highlighted in yellow and in HIV-negative individuals in blue. All genera with a raw p-value  $<0.05$  with ANOVA are listed and those with a p-value  $<0.05$  after correcting for multiple tests with the FDR technique are marked with a star. Panel C) shows 97% ID OTUs that discriminated between the fecal microbiota of individuals chronically infected with HIV (untreated) and HIV-negative in a Random Forest analysis. All OTUs with an importance score  $>0.001$  are listed. The direction of change was determined based on their means. OTUs that increased in relative abundance with HIV infection are in yellow and decreased are in blue. Those which Random Forests analysis determined to be important for discrimination but for which direction of change with HIV infection could not be reliably determined (ANOVA  $p>0.1$ ) are listed as unresolved and not shaded. The Mean and standard error of the importance score for 100 rarefactions at 4600 sequences per sample is listed. A representative sequence for each OTU was BLASTed against a database of 16S rRNA gene sequences from type strains and the top hit, % ID to this top hit, and alignment and sequence length for the top hit are listed. OTUs for which there was a %ID greater than 97% ID over the near full length are in bold. The mean relative abundance in individuals chronically infected with HIV and HIV negative are listed as well as the probability that the relative abundance is significantly different between the two groups as calculated with ANOVA. Related to Fig. 2. **See Excel file.**

**Table S3:** *Studies included in the meta-analyses shown in Fig. 3 and Fig. S3*

| Study            | Target region/<br>primer                | Sequencing<br>platform         | General description                                                                                                                            | Result                                                                                                                                              | Reference                 |
|------------------|-----------------------------------------|--------------------------------|------------------------------------------------------------------------------------------------------------------------------------------------|-----------------------------------------------------------------------------------------------------------------------------------------------------|---------------------------|
| Global gut       | <b>V4</b><br>CCGGACTACHV<br>GGGTWTCTAAT | Illumina Hi-<br>Seq 2000       | Fecal samples obtained at a single timepoint from 531 individuals, aged 0-83 years, from the USA, the Amazonas state of Venezuela, and Malawi. | Stratification by age and country, with USA particularly distinct.                                                                                  | (Yatsunenko et al., 2012) |
| Diet_enterotypes | <b>V2</b><br>CTGCTGCCTYCC<br>GTA        | 454<br>Titanium                | Fecal samples from 98 individuals with long-term diet inventories .                                                                            | Strongly association of fecal microbiota with long-term diets, particularly protein and animal fat (Bacteroides) versus carbohydrates (Prevotella). | (Wu et al., 2011)         |
| IBD_twins        | <b>V1-3</b><br>GGTACCGCGGCKGC<br>TGGCAC | 454 FLX                        | Fecal samples from a cohort of 40 twin pairs concordant or discordant for Crohn's disease or ulcerative colitis.                               | A particularly large divergence noted with Ileal Crohn's disease.                                                                                   | (Willing et al., 2010)    |
| HIV              | <b>V4</b><br>CCGGACTACHV<br>GGGTWTCTAAT | MiSeq<br>personal<br>Sequencer | This study.                                                                                                                                    |                                                                                                                                                     |                           |

## Supplemental Experimental Procedures

### Subject Recruitment

All study participants were residents of the Denver metropolitan area and were recruited and studied at the Clinical Translational Research Center of the University of Colorado Hospital. Four cohorts were prospectively recruited based on HIV-1 status: **1) *Recent HIV-1 infection***: Individuals with a high risk HIV-1 exposure in the past six months with a positive ELISA or rapid test and Western Blot obtained within 21 days prior to study entry and one of the following: A. A non-reactive detuned ELISA (either a  $\mu$ 11-LS or a LgG-Capture BED-EIA assay). B. Documented negative ELISA or rapid test within 6 months prior to study entry or C. Documented negative or indeterminate Western blot within 6 months prior to study entry. **2) *Chronic HIV-1 infection untreated***: Individuals with a positive antibody or PCR test at least 6 months prior to enrollment and either ART drug-naïve (defined as < 10 days of ART treatment at any time prior to entry), or previously on ART but off treatment for the previous 6 months prior to screening. **3) *Chronic HIV-1 infection on long-term ART***: ART for  $\geq 12$  months with a minimum of three ART drugs prior to study entry and <50 copies HIV RNA/mL within 30 days prior to study entry and no plasma HIV-1 RNA  $\geq 50$  copies/mL in the past 6 months. **4) *Healthy controls***: HIV negative individuals matched to HIV-infected participants for sex, age and smoking status.

### Sequence Data Analysis

Raw sequences were processed using the default parameters of QIIME version 1.5.0 (Caporaso et al., 2010b). Specifically, we truncated the reads after runs of >3

consecutive low quality base calls and excluded reads with  $<0.75$  of the original read length after truncation. We excluded reads with ambiguous bases after quality trimming. We demultiplexed the samples using error-correcting Golay bar-codes to prevent mis-assignment. OTUs with only one sequence in them were removed from the analysis as likely noise.

To produce the phylogenetic tree for input into UniFrac we aligned a representative sequence for each OTU using PyNAST (Caporaso et al., 2010a) and constructed a phylogenetic tree from this alignment using FastTree2 (Price et al., 2010). Random Forests classification on the HIV data was carried out using SourceTracker software (<http://sourceforge.net/projects/sourcetracker/>)(Knights et al., 2011) with 500 trees and all default settings. We included only one sample per individual so that each microbiota could be considered an independent observation and rarefied the number of sequences per sample at 4,600. Random Forests analysis was performed for each comparison on 100 rarefied versions of the data, and the average cross-validation error estimates and OTU importance estimates were calculated using custom code. Random Forests assigns an importance score to each OTU by estimating the increase in error caused by removing that OTU from the set of predictors. We considered an OTU to be highly predictive if its average importance score was at least 0.001, as previously done in (Yatsunenko et al., 2012). Additionally, we determined the direction of change with HIV status as the difference in the mean relative abundance in samples from healthy individuals and individuals chronically infected with HIV. OTUs for which the direction of change was not supported by an ANOVA p-value of less than 0.1 were excluded from further consideration.

Bacterial families and genera represented in each sample were determined using the RDP classifier retrained on the greengenes taxonomy (McDonald et al., 2012). For statistical comparisons of healthy individuals to those chronically infected with HIV, only a single sample per person was used again so that each sample could be considered an independent observation. Significant differences in taxonomic groups and OTUs were evaluated using the ANOVA test. Comparisons were only performed on OTUs/taxa found in at least 4 individuals, and p-value were corrected for multiple comparisons using the false discovery rate of Benjamini and Hochberg (Benjamini and Hochberg, 1995), using the `otu_category_significance.py` script of QIIME.

To determine whether any of the discriminating OTUs were highly related to bacterial type strains, we compared the sequences to near full-length 16S rRNA gene sequences from 9177 bacterial type strains downloaded from the Ribosomal Database Project II database (Maidak et al., 2001) using the `blastall` program. We further evaluated the relationships between discriminating OTUs and type species by inserting them into a reference phylogenetic tree using the parsimony insertion algorithm in ARB (Ludwig et al., 2004). Sequences were first aligned using NAST (DeSantis et al., 2006), and then inserted into the reference tree provided in the 16S rRNA ARB database of Philip Hugenholtz (Hugenholtz, 2002), which can be downloaded under the resources tab of the RDP website (<http://rdp.cme.msu.edu>), and used the filter supplied in this database (`lanemaskPH`) to exclude hypervariable positions that are not well aligned with NAST. Trees were exported from ARB and loaded into TopiaryExplorer to color the node names and branches (Pirrung et al., 2011).

### **Bacterial cultures and lysates**

Type strains for *B. dorei* (DSM 17855), *B. fluxus* (DSM 22534), *P. copri* (DSM18205) and *E. bifforme* (DSM 3989) were purchased from the DSMZ and incubated anaerobically in balch tubes with butyl rubber stoppers at 37°C until stationary phase. All 4 isolates were cultured in rich gut microbiota medium described in (Goodman et al., 2011). To avoid denaturing potentially critical proteins and because these bacteria are all non spore-forming strict anaerobes, bacterial lysates were made without a “heat-kill” step. Bacterial cultures were washed, resuspended in water and subjected to multiple rounds of freeze/thaw to disrupt the membrane. In addition, *E. coli* serotype O55:K59(B5) was purchased from the ATCC. It was grown to log phase in nutrient broth (BD 234000) and because it is an aerobic bacteria it was heat killed by autoclaving for 20 minutes. The lysates were then quantified using a BCA protein assay kit (Pierce Rocford, Ill) and adjusted to 1 mg/ml and stored at -80°C. To confirm that the bacterial lysates were not able to grow, 100ug of lysate was cultured at 37°C in tissue culture media (RPMI+ 10% human serum) without antibiotics for 7 days. Cultures were carefully inspected and no bacterial growth was noted.

### **T Cell Proliferation assay**

Blood was collected from 10 untreated HIV+ subjects with chronic infection and 11 HIV seronegative subjects in Vacutainer tubes containing sodium heparin (BD Vacutainer) and PBMCs were isolated from whole blood by density gradient centrifugation on Ficoll (Amersham Biosciences). Labeled Cells were analyzed using a



LSR-II flow cytometer (BD Immunocytometry Systems). Between 250000 and 500000 events were collected. Electronic compensation was performed with Ab capture beads (BD Biosciences) stained separately with individual mAbs used in the test samples. To ensure the accuracy and precision of the measurements taken from day to day quality control was performed on the LSR-II daily using the Cytometer Setup & Tracking (CS&T) feature within BD FACSDiva software. The data files were analyzed using Diva software (BD) and FlowJo Software (Treestar, Co). Lymphocytes were gated by their forward and side scatter profile. CD3<sup>+</sup>, CD4<sup>+</sup> T cells were then selected and their Cell Trace profile was analyzed. Unstimulated PBMC labeled with Cell Trace were used to determine where the gate for proliferating cells was set and the percentage of divided cells (Cell Trace low) were determined.

## Supplemental References

Benjamini, Y., and Hochberg, Y. (1995). Controlling the false discovery rate: a practical and powerful approach to multiple testing. *J R Statist Soc B* 57, 289-300.

Bjarnason, I., Sharpstone, D.R., Francis, N., Marker, A., Taylor, C., Barrett, M., Macpherson, A., Baldwin, C., Menzies, I.S., Crane, R.C., *et al.* (1996). Intestinal inflammation, ileal structure and function in HIV. *AIDS* 10, 1385-1391.

Brenchley, J.M., and Douek, D.C. (2008). HIV infection and the gastrointestinal immune system. *Mucosal immunology* 1, 23-30.

Caporaso, J.G., Bittinger, K., Bushman, F.D., DeSantis, T.Z., Andersen, G.L., and Knight, R. (2010a). PyNAST: a flexible tool for aligning sequences to a template alignment. *Bioinformatics* 26, 266-267.

Caporaso, J.G., Kuczynski, J., Stombaugh, J., Bittinger, K., Bushman, F.D., Costello, E.K., Fierer, N., Pena, A.G., Goodrich, J.K., Gordon, J.I., *et al.* (2010b). QIIME allows analysis of high-throughput community sequencing data. *Nature methods* 7, 335-336.

DeSantis, T.Z., Hugenholtz, P., Keller, K., Brodie, E.L., Larsen, N., Piceno, Y.M., Phan, R., and Andersen, G.L. (2006). NAST: A multiple sequence alignment server for comparative analysis of 16S rRNA genes. *Nucleic Acids Res* 34, 394-399.

Goodman, A.L., Kallstrom, G., Faith, J.J., Reyes, A., Moore, A., Dantas, G., and Gordon, J.I. (2011). Extensive personal human gut microbiota culture collections characterized and manipulated in gnotobiotic mice. *Proc Natl Acad Sci U S A* 108, 6252-6257.

Hugenholtz, P. (2002). Exploring prokaryotic diversity in the genomic era. *Genome Biol* 3, 1-8.

Knights, D., Kuczynski, J., Koren, O., Ley, R.E., Field, D., Knight, R., DeSantis, T.Z., and Kelley, S.T. (2011). Supervised classification of microbiota mitigates mislabeling errors. *The ISME journal* 5, 570-573.

Ludwig, W., Strunk, O., Westram, R., Richter, L., Meier, H., Yadhukumar, Buchner, A., Lai, T., Steppi, S., Jobb, G., *et al.* (2004). ARB: a software environment for sequence data. *Nucleic Acids Res* 32, 1363-1371.

Maidak, B.L., Cole, J.R., Lilburn, T.G., Parker, C.T., Jr., Saxman, P.R., Farris, R.J., Garrity, G.M., Olsen, G.J., Schmidt, T.M., and Tiedje, J.M. (2001). The RDP-II (Ribosomal Database Project). *Nucleic Acids Res* 29, 173-174.

McDonald, D., Price, M.N., Goodrich, J., Nawrocki, E.P., DeSantis, T.Z., Probst, A., Andersen, G.L., Knight, R., and Hugenholtz, P. (2012). An improved Greengenes taxonomy with explicit ranks for ecological and evolutionary analyses of bacteria and archaea. *Isme Journal* 6, 610-618.

Pirrung, M., Kennedy, R., Caporaso, J.G., Stombaugh, J., Wendel, D., and Knight, R. (2011). TopiaryExplorer: visualizing large phylogenetic trees with environmental metadata. *Bioinformatics* 27, 3067-3069.

Price, M.N., Dehal, P.S., and Arkin, A.P. (2010). FastTree 2--approximately maximum-likelihood trees for large alignments. *PloS one* 5, e9490.

Willing, B.P., Dicksved, J., Halfvarson, J., Andersson, A.F., Lucio, M., Zheng, Z., Jarnerot, G., Tysk, C., Jansson, J.K., and Engstrand, L. (2010). A pyrosequencing study in twins shows that gastrointestinal microbial profiles vary with inflammatory bowel disease phenotypes. *Gastroenterology* 139, 1844-1854 e1841.

Wu, G.D., Chen, J., Hoffmann, C., Bittinger, K., Chen, Y.Y., Keilbaugh, S.A., Bewtra, M., Knights, D., Walters, W.A., Knight, R., *et al.* (2011). Linking long-term dietary patterns with gut microbial enterotypes. *Science* 334, 105-108.

Yatsunenko, T., Rey, F.E., Manary, M.J., Trehan, I., Dominguez-Bello, M.G., Contreras, M., Magris, M., Hidalgo, G., Baldassano, R.N., Anokhin, A.P., *et al.* (2012). Human gut microbiome viewed across age and geography. *Nature* 486, 222-227.
